# Supplementary material for: Defining three ferroptosis-based molecular subtypes and developing a prognostic risk model for high-grade serous ovarian cancer
Source: publisher site journal article supplement (doi:10.18632/aging.205857), 2024-05-24
Supplement: Supplementary file [file aging-v16i10-205857-supplementary-material-SD1.pdf]

## SUPPLEMENTARY FIGURE

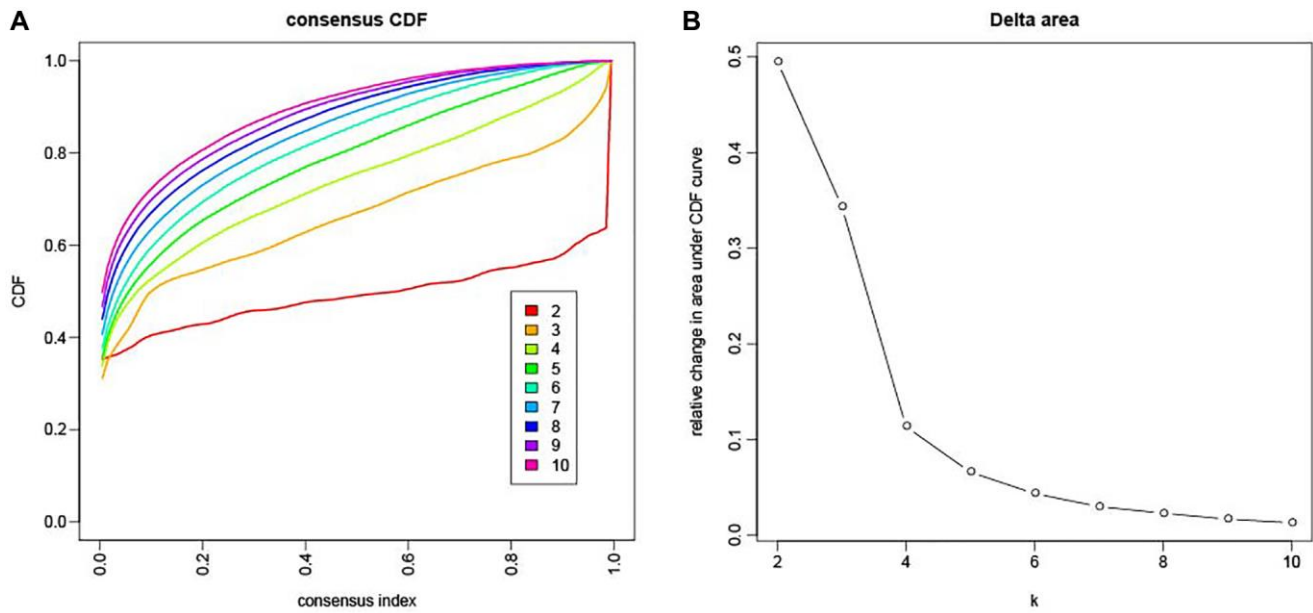

**Supplementary Figure 1. Consensus clustering analysis in TCGA-OV cohort to identify optimal clusters. (A)** Consensus CDF in TCGA cohort. **(B)** Relative changes in area under CDF Delta curve.
